# Supplementary material
Source: ML conference proceedings conference paper supplement (https://openaccess.thecvf.com/content/CVPR_2019/html/Shi_WarpGAN_Automatic_Caricature_CVPR_2019_paper.html)
Supplement: Supplementary file 2 [file Shi_WarpGAN_Automatic_Caricature_CVPR_2019_supplemental.zip]

Archive with 3 entries (3 files):
- 6807-supp.pdf
- caricature_video.avi
- README.txt
