# Supplementary material
Source: ML conference proceedings conference paper supplement (https://openaccess.thecvf.com/content/CVPR_2019/html/Shi_WarpGAN_Automatic_Caricature_CVPR_2019_paper.html)
Supplement: Supplementary file 2 [file Shi_WarpGAN_Automatic_Caricature_CVPR_2019_supplemental.zip › README.txt]

CODEC: MPEG-4 Video (DX50), DIVX

Runs with VLC Media Player: https://www.videolan.org/vlc/

In case the video does not work, please visit the following:

https://youtu.be/DI9Mf-_sZZs 

(Anonymous post)
